# Supplementary material
Source: MDPI journal article supplement (https://www.mdpi.com/1424-2818/12/6/237)

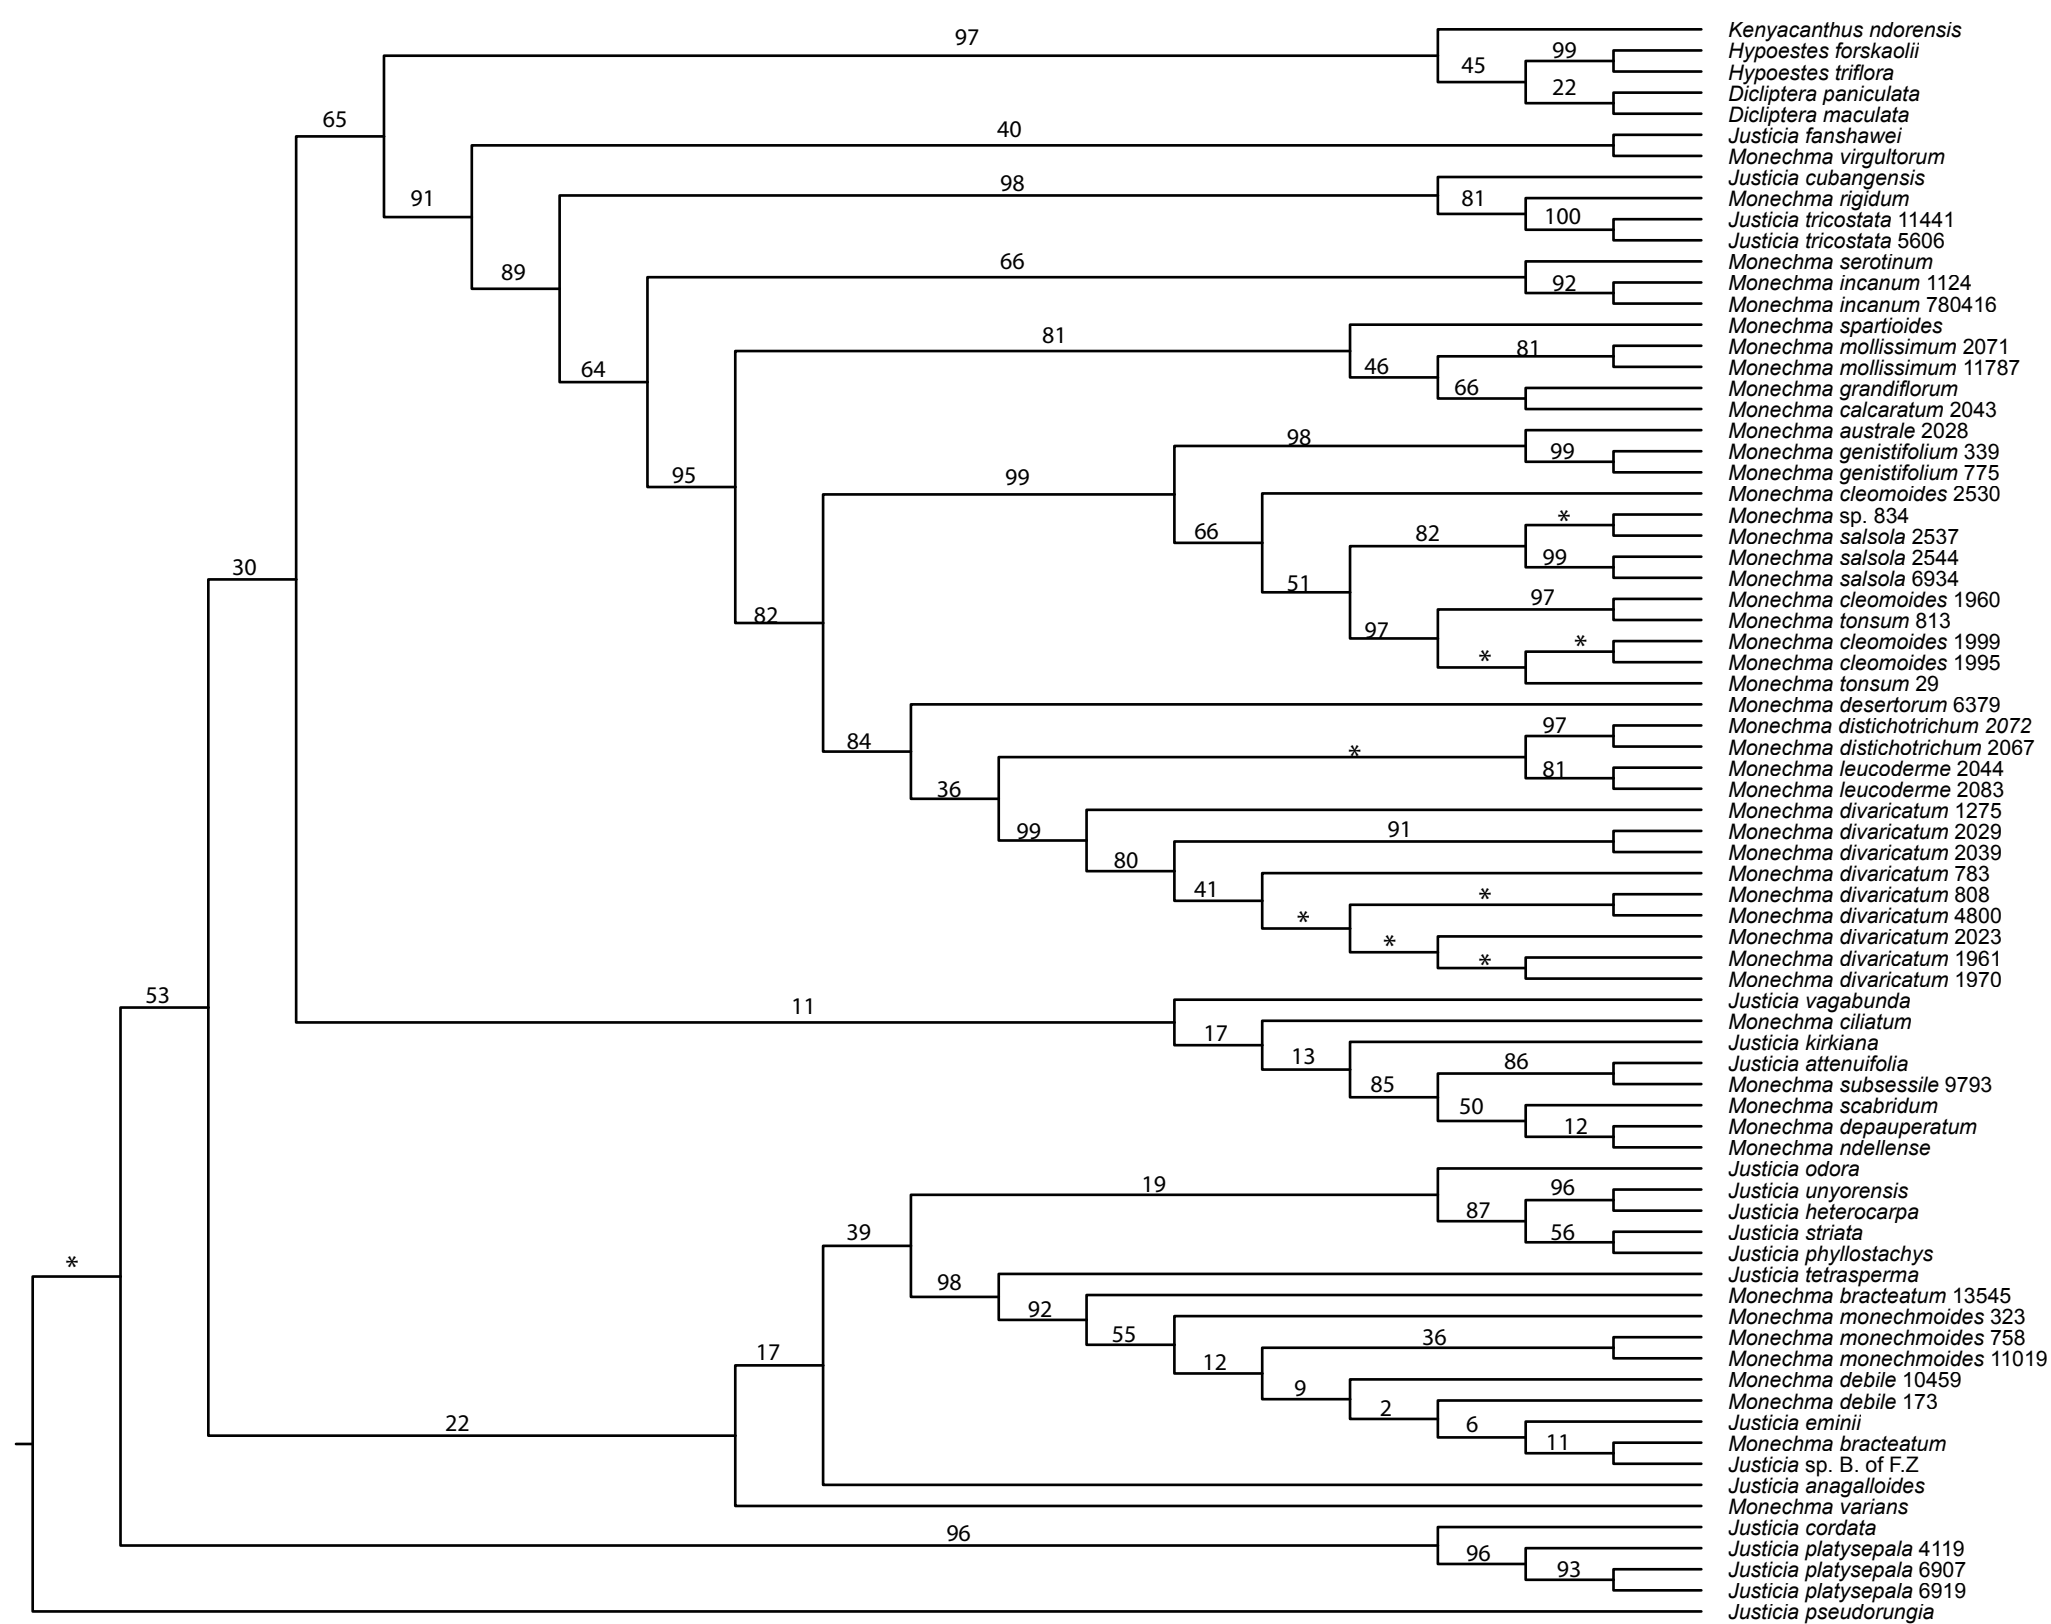

Supplement: s1 [file s1]

10 major clades of the Justicioid lineage  
(Justicieae)

Thickened branches = > 0.98 BPP &  
70% MLBS

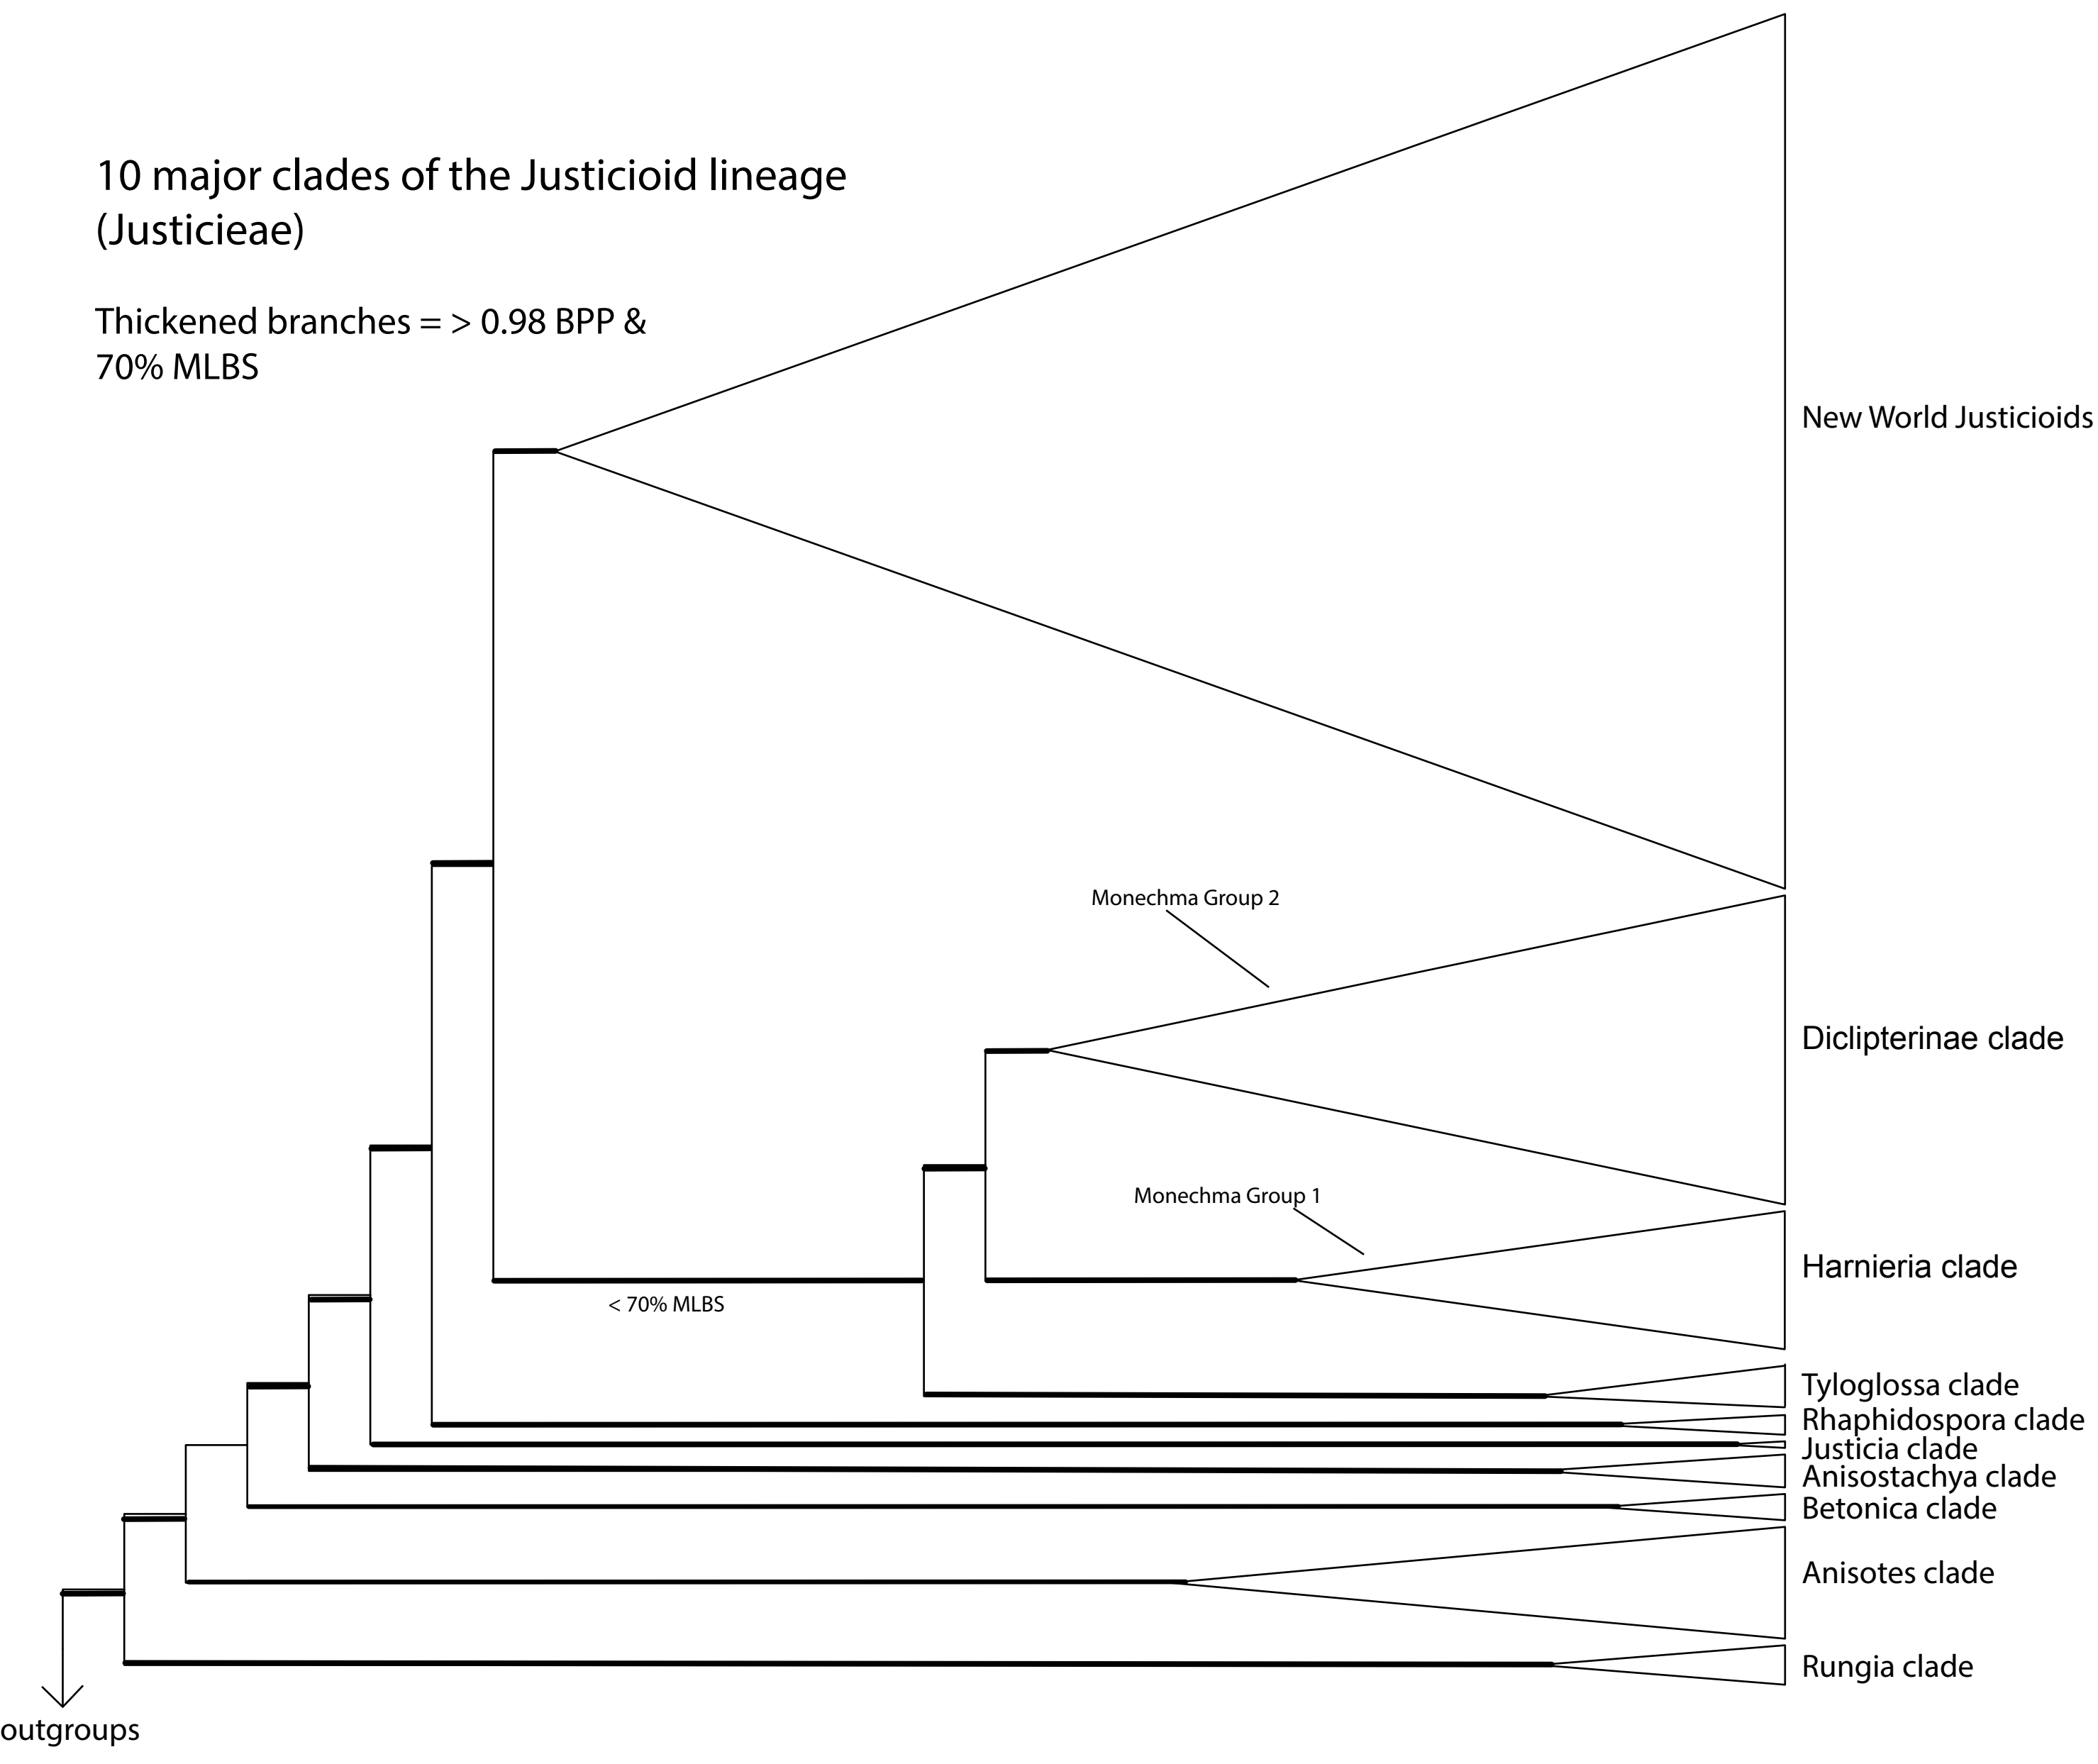

Supplement: s1 [file s1]

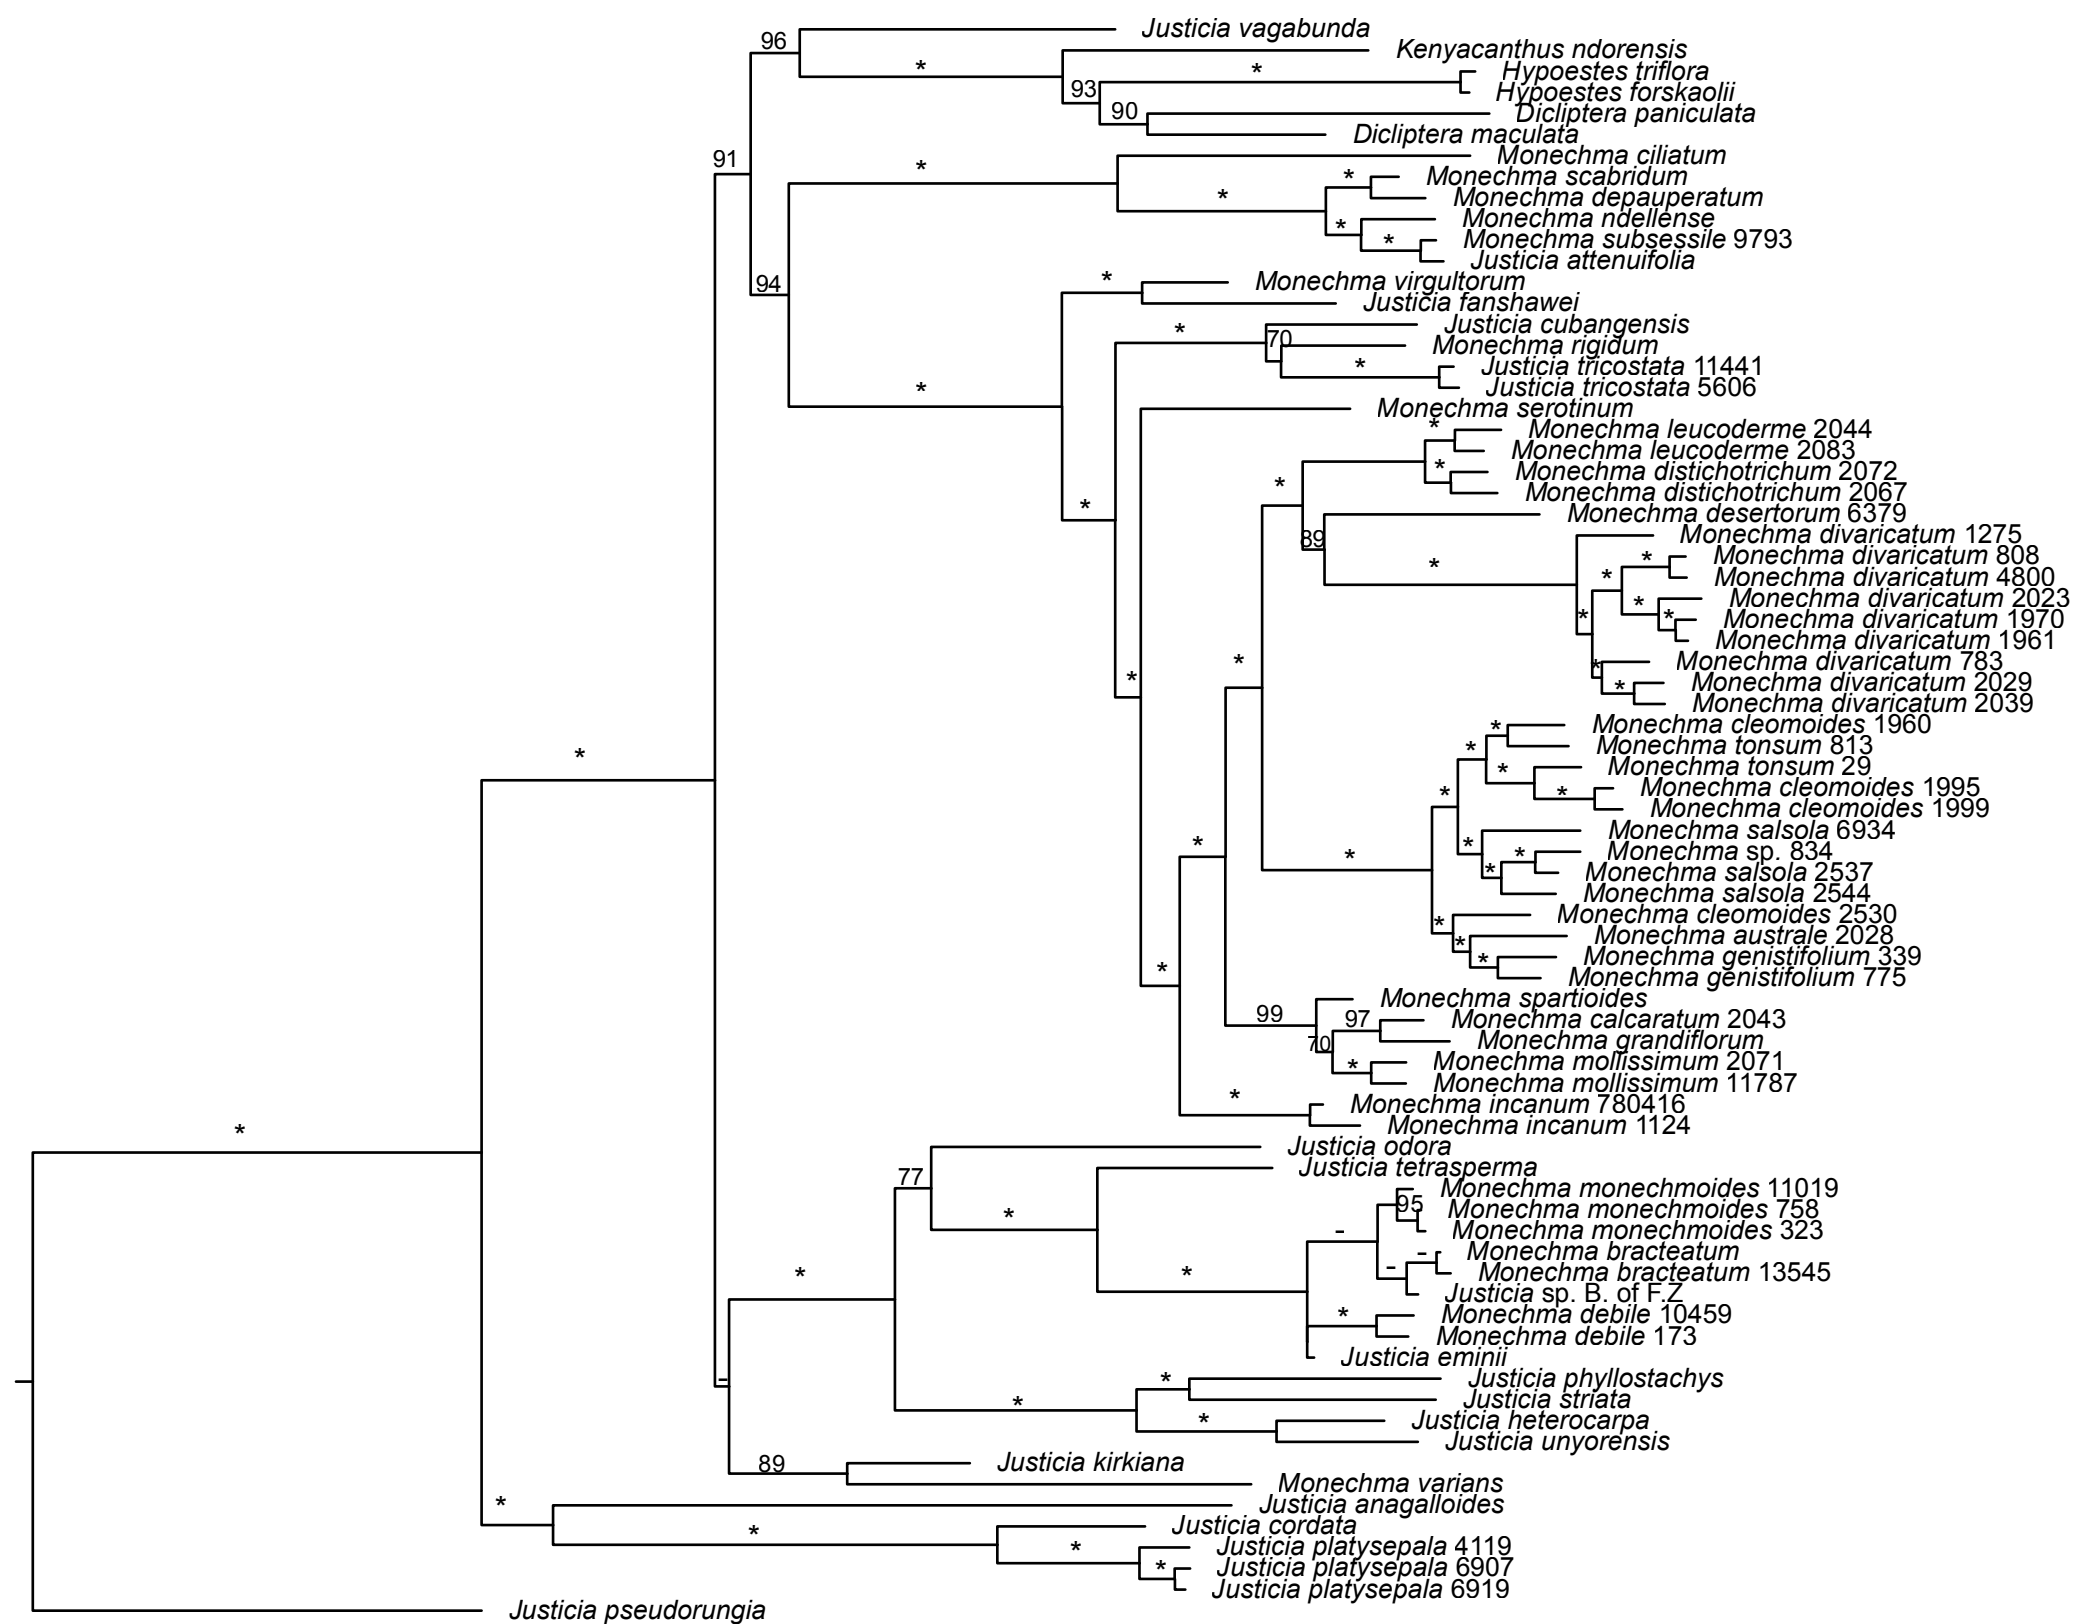

0.01

Supplement: s1 [file s1]

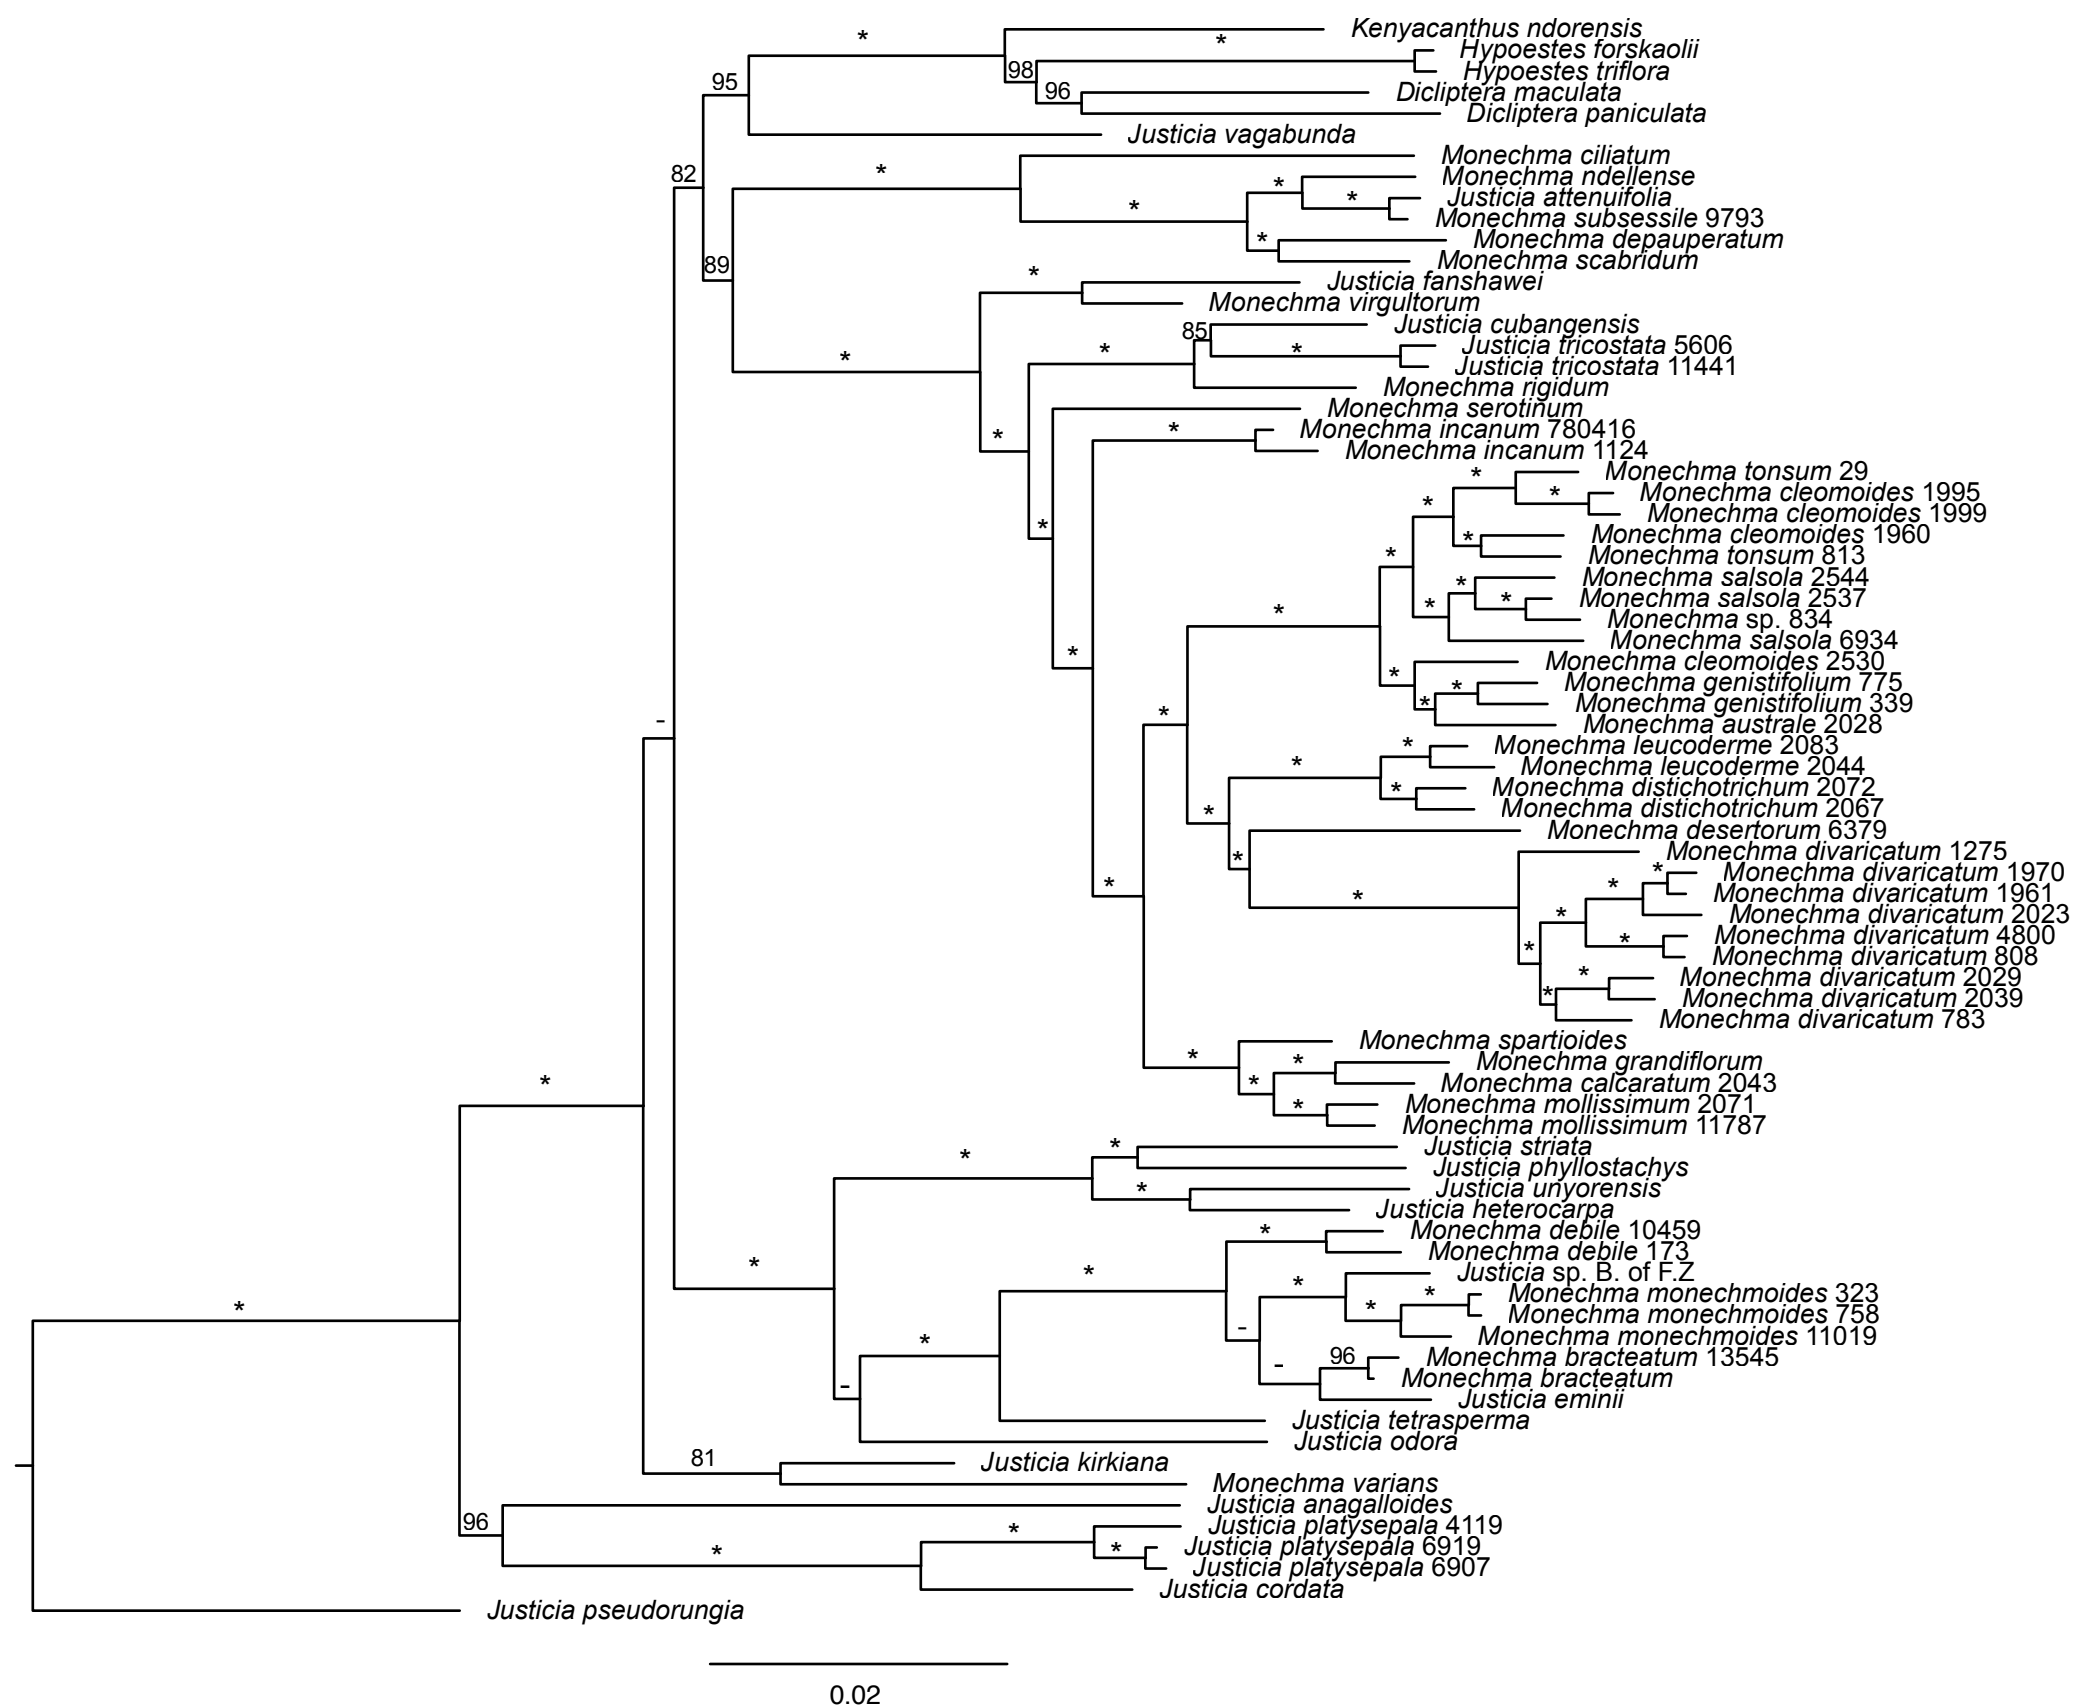

Supplement: s1 [file s1]

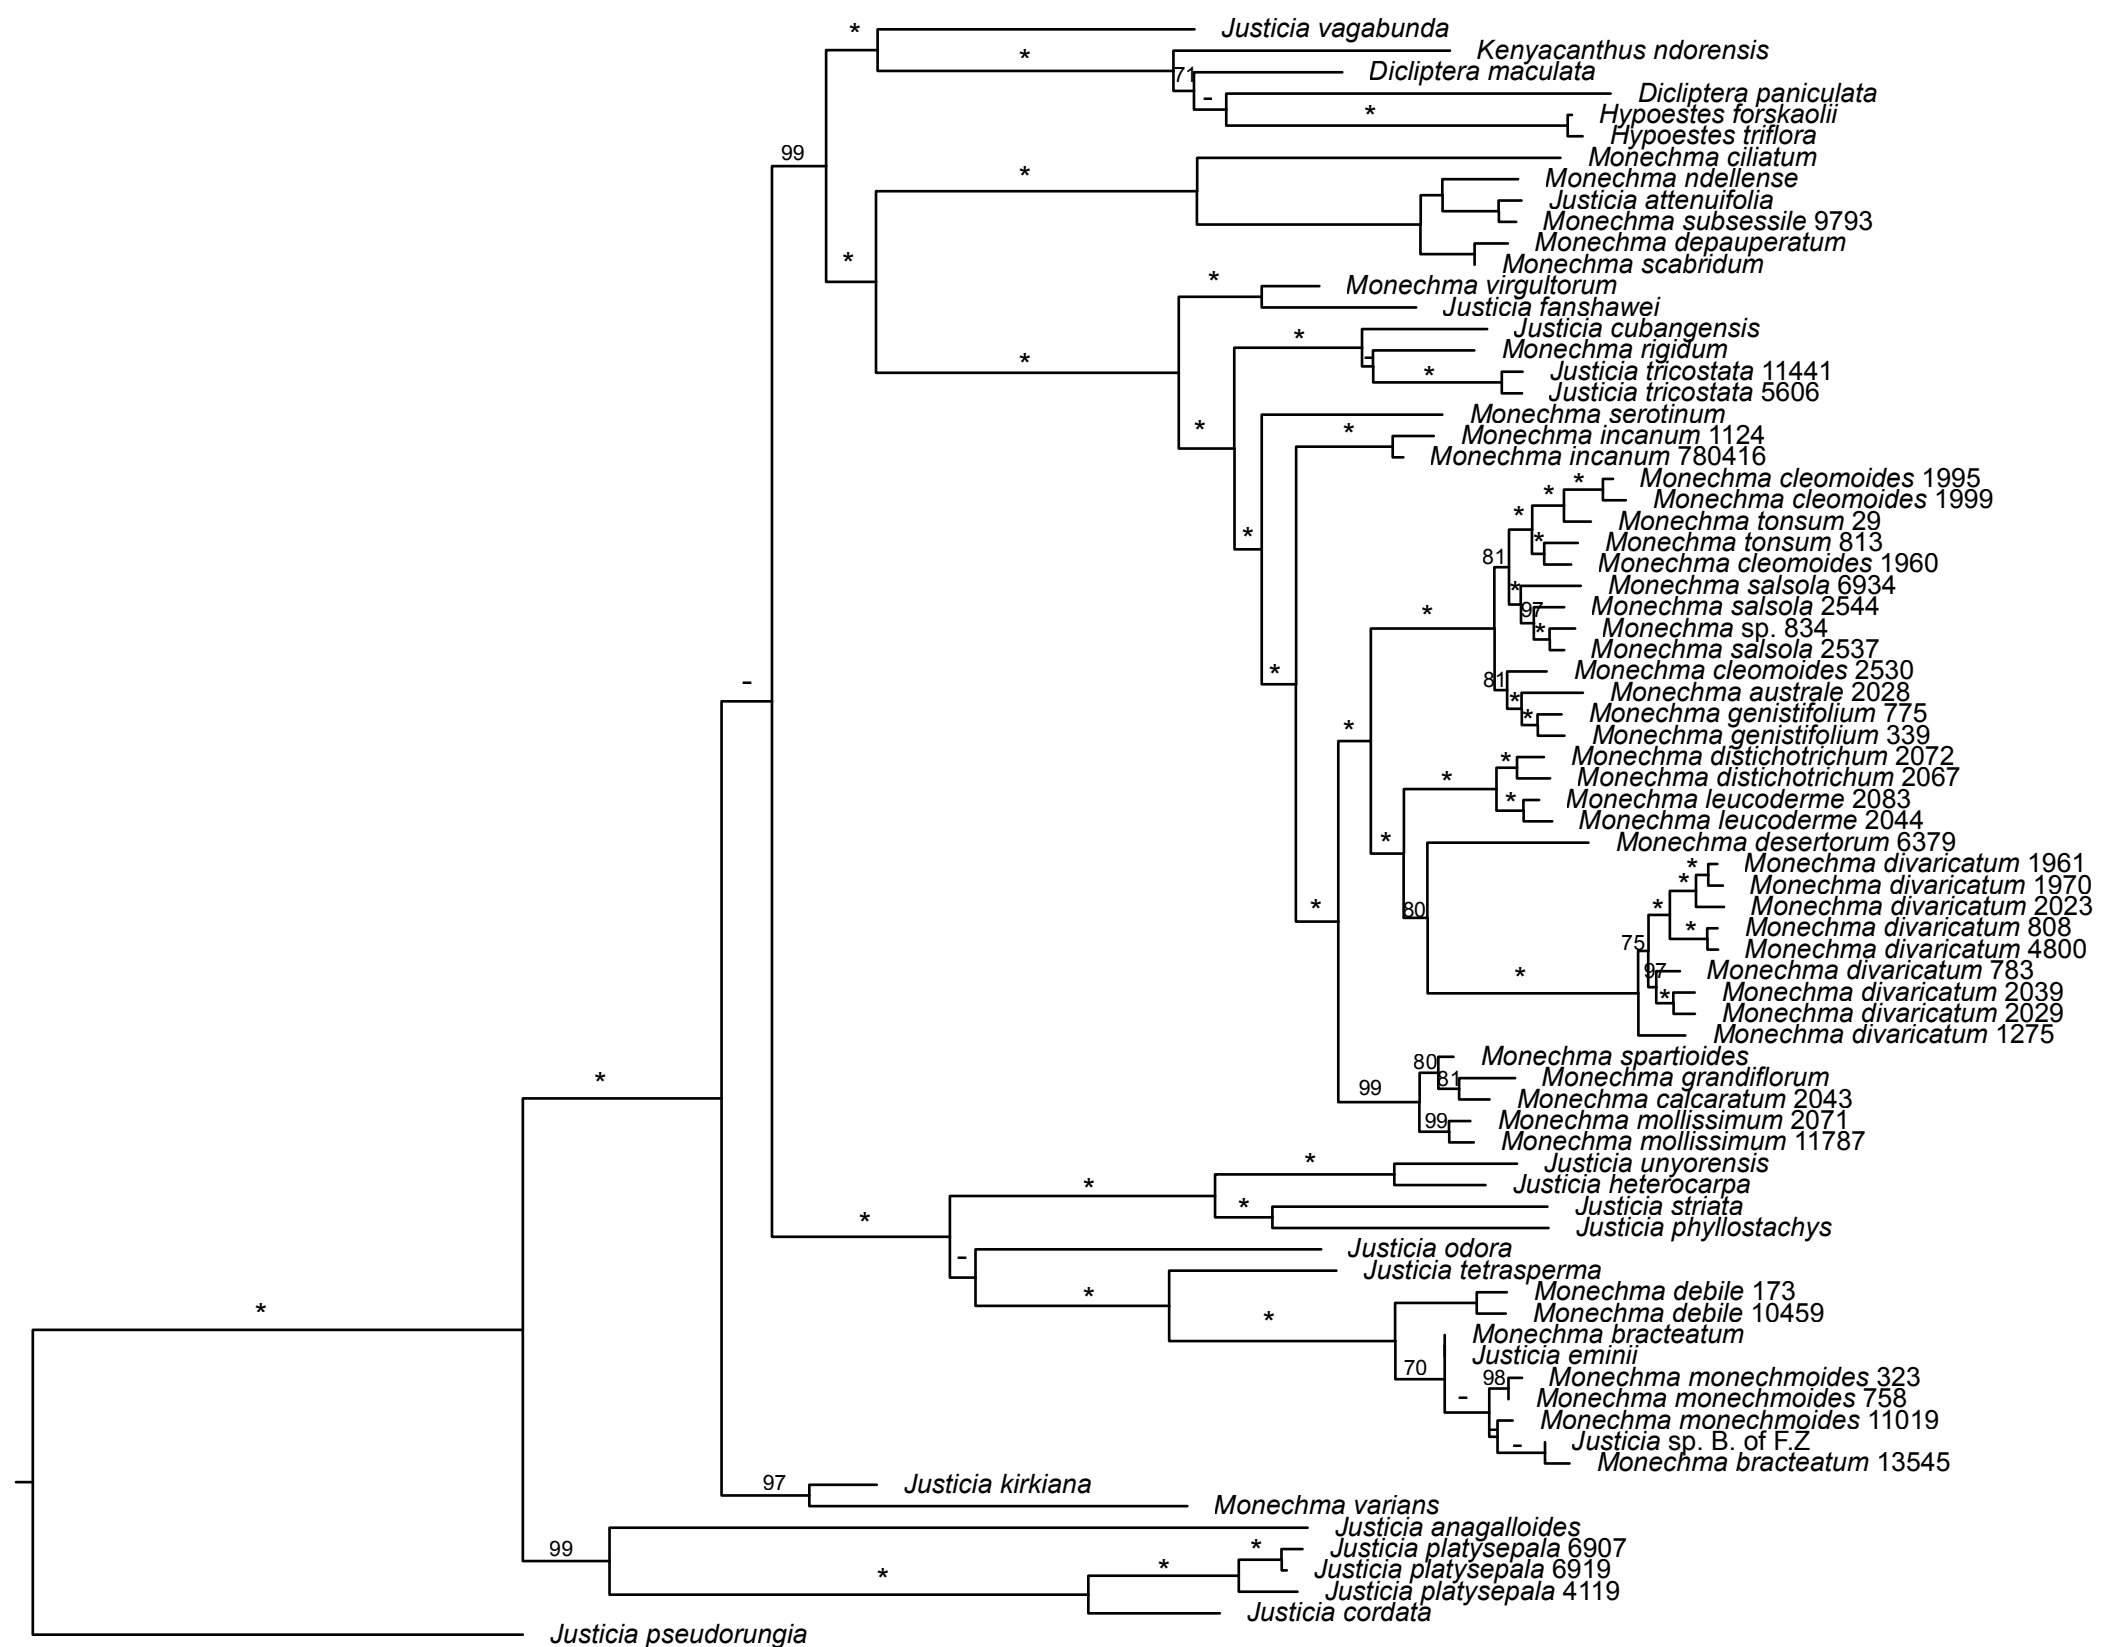

0.008

Supplement: s1 [file s1]
